# Supplementary material for: Performance of the ImmuView and BinaxNOW assays for the detection of urine and cerebrospinal fluid Streptococcus pneumoniae and Legionella pneumophila serogroup 1 antigen in patients with Legionnaires’ disease or pneumococcal pneumonia and meningitis
Source: PLOS journal article supplement (doi:10.1371/journal.pone.0238479), 2020-08-31
Supplement: S10 (10.1371/journal.pone.0238479.s010) [file journal.pone.0238479.s010]

S10 Table

Agreement of BinaxNOW and ImmuView *L. pneumophila* Assays Including Urines from UPenn Patients with *Legionella* infections other than non-*L. pneumophila* serogroup 1, Culture-negative Outbreak Suspects and Culture-negative Sporadic Cases with Initial Borderline-positive Urine Antigen Tests<sup>a</sup>. SSI and UPenn Sites Combined.

|          | BinaxNOW |          |
|----------|----------|----------|
| ImmuView | positive | negative |
| positive | 127      | 11       |
| negative | 5        | 249      |

p=0.21, McNemar test

<sup>a</sup> This includes, in addition to the results shown in Table 5, seven patients with culture-positive Legionnaires' disease caused by *L. wadsworthii*, *L. bozeman*, *L. longbeachae* serogroup 1 (2 patients), *L. pneumophila* serogroup 2 and *L. pneumophila* serogroup 4 (2 patients), all of which were negative in both assays; three patients who were suspects in two different Legionnaires' disease outbreaks caused by *L. pneumophila* serogroup 1, but were originally culture negative and had borderline-positive urine antigen tests at the time of original collection; and three suspected sporadic cases of Legionnaires' disease who had borderline-positive urine antigen tests and negative cultures at the time of collection.
